# Supplementary material for: Flexible and rigid spinel ferrite carboneous composite as a future of tunable absorption dominant cmWave shielding materials
Source: Royal Society of Chemistry journal article supplement (doi:10.1039/d3ta07624e), 2024-01-01
Supplement: d3ta07624e1.pdf [file d3ta07624e1.pdf]

# Supporting Information

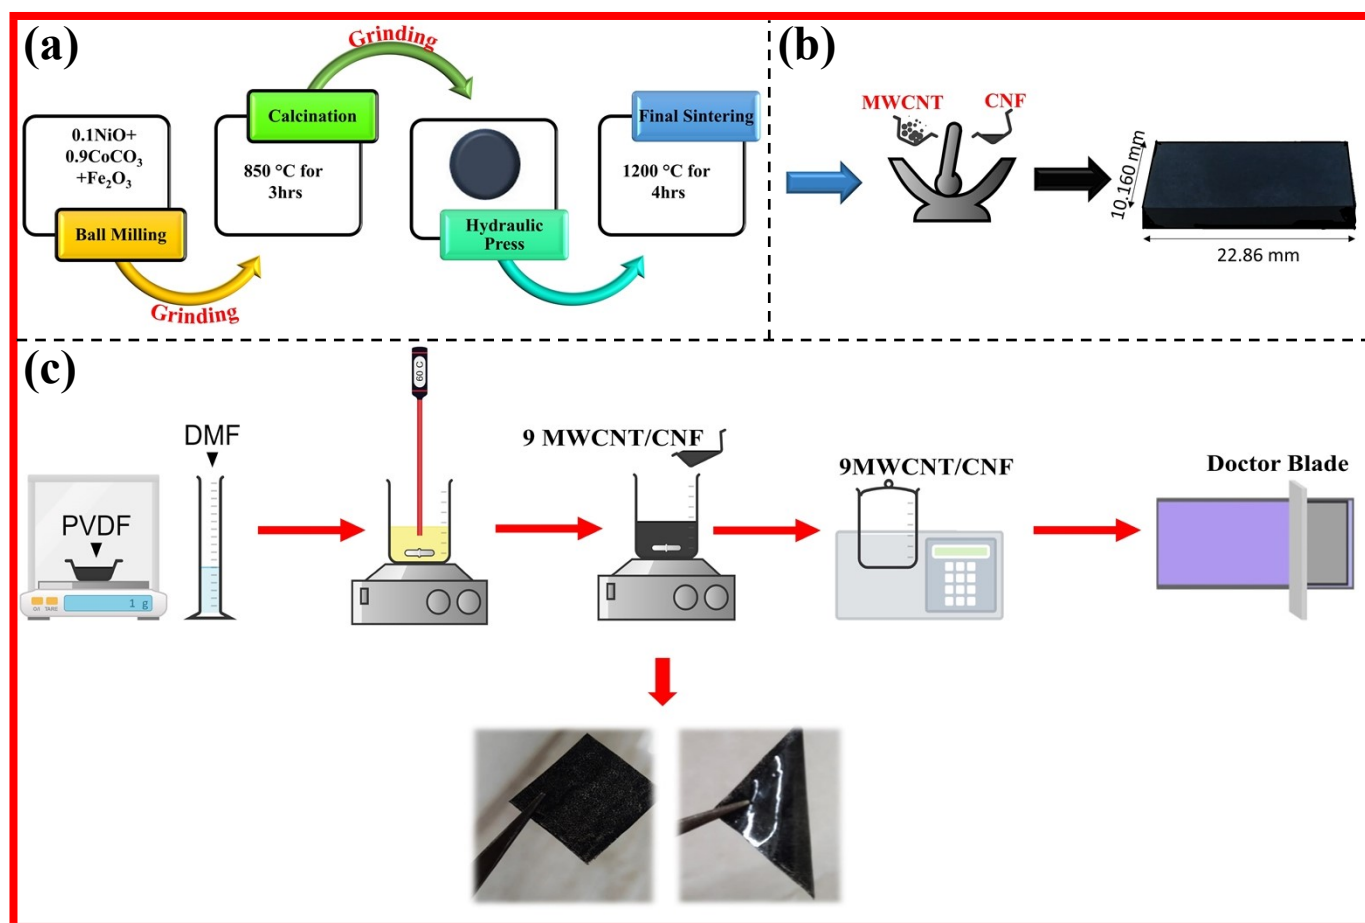

Fig.S1 (a-b) Schematic representation for synthesis of CNF, 3MWCNT/CNF, 6 MWCNT/CNF, and 9 MWCNT/CNF composites (c) Schematic for synthesis of P9MC1, P9MC2, and P9MC3 composite.

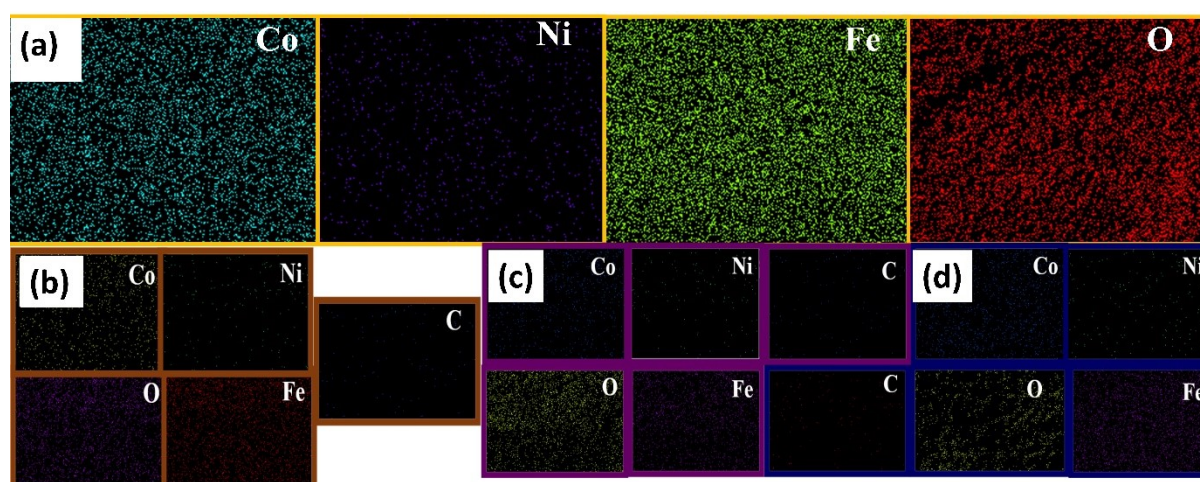

Fig.S2 (a-b) Elemental mapping for (h) pure CNF (i) 3MWCNT/CNF composite Elemental mapping for (n) 6MWCNT/CNF composite (o) 9MWCNT/CNF composite.

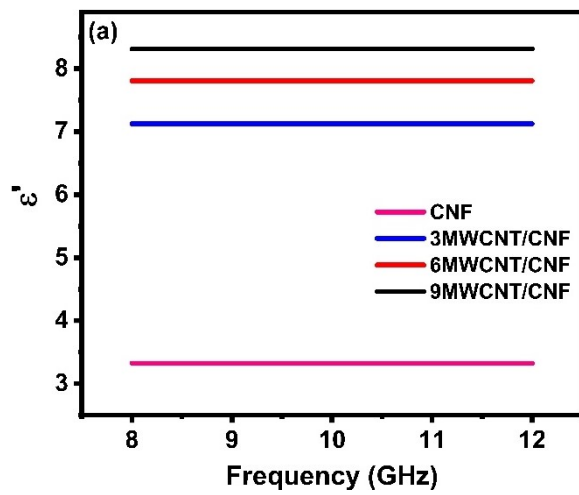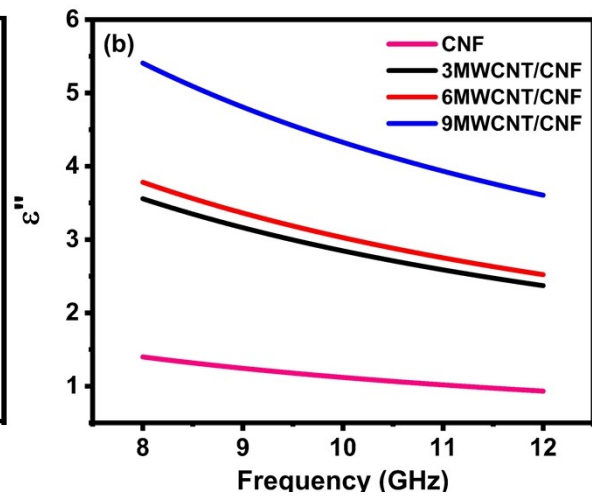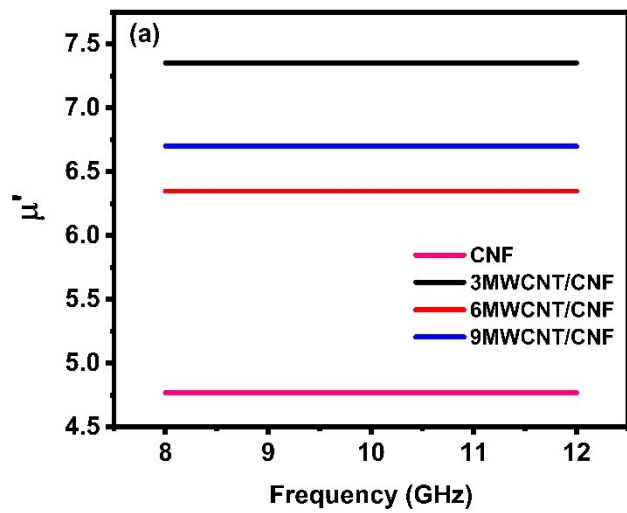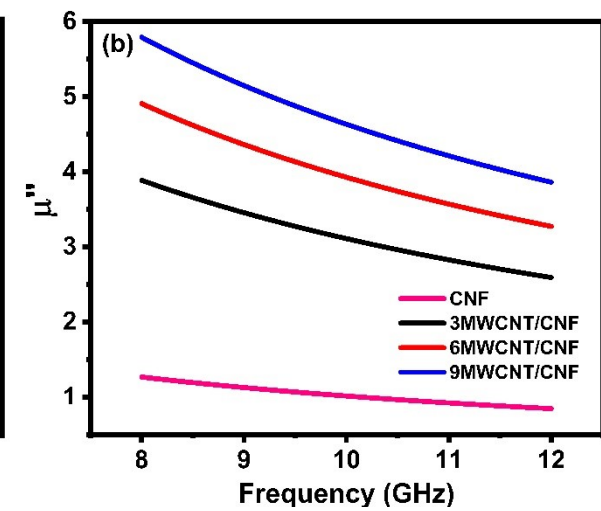

Fig.S4 (a-b) Magnetic properties of rigid composites in microwave range.

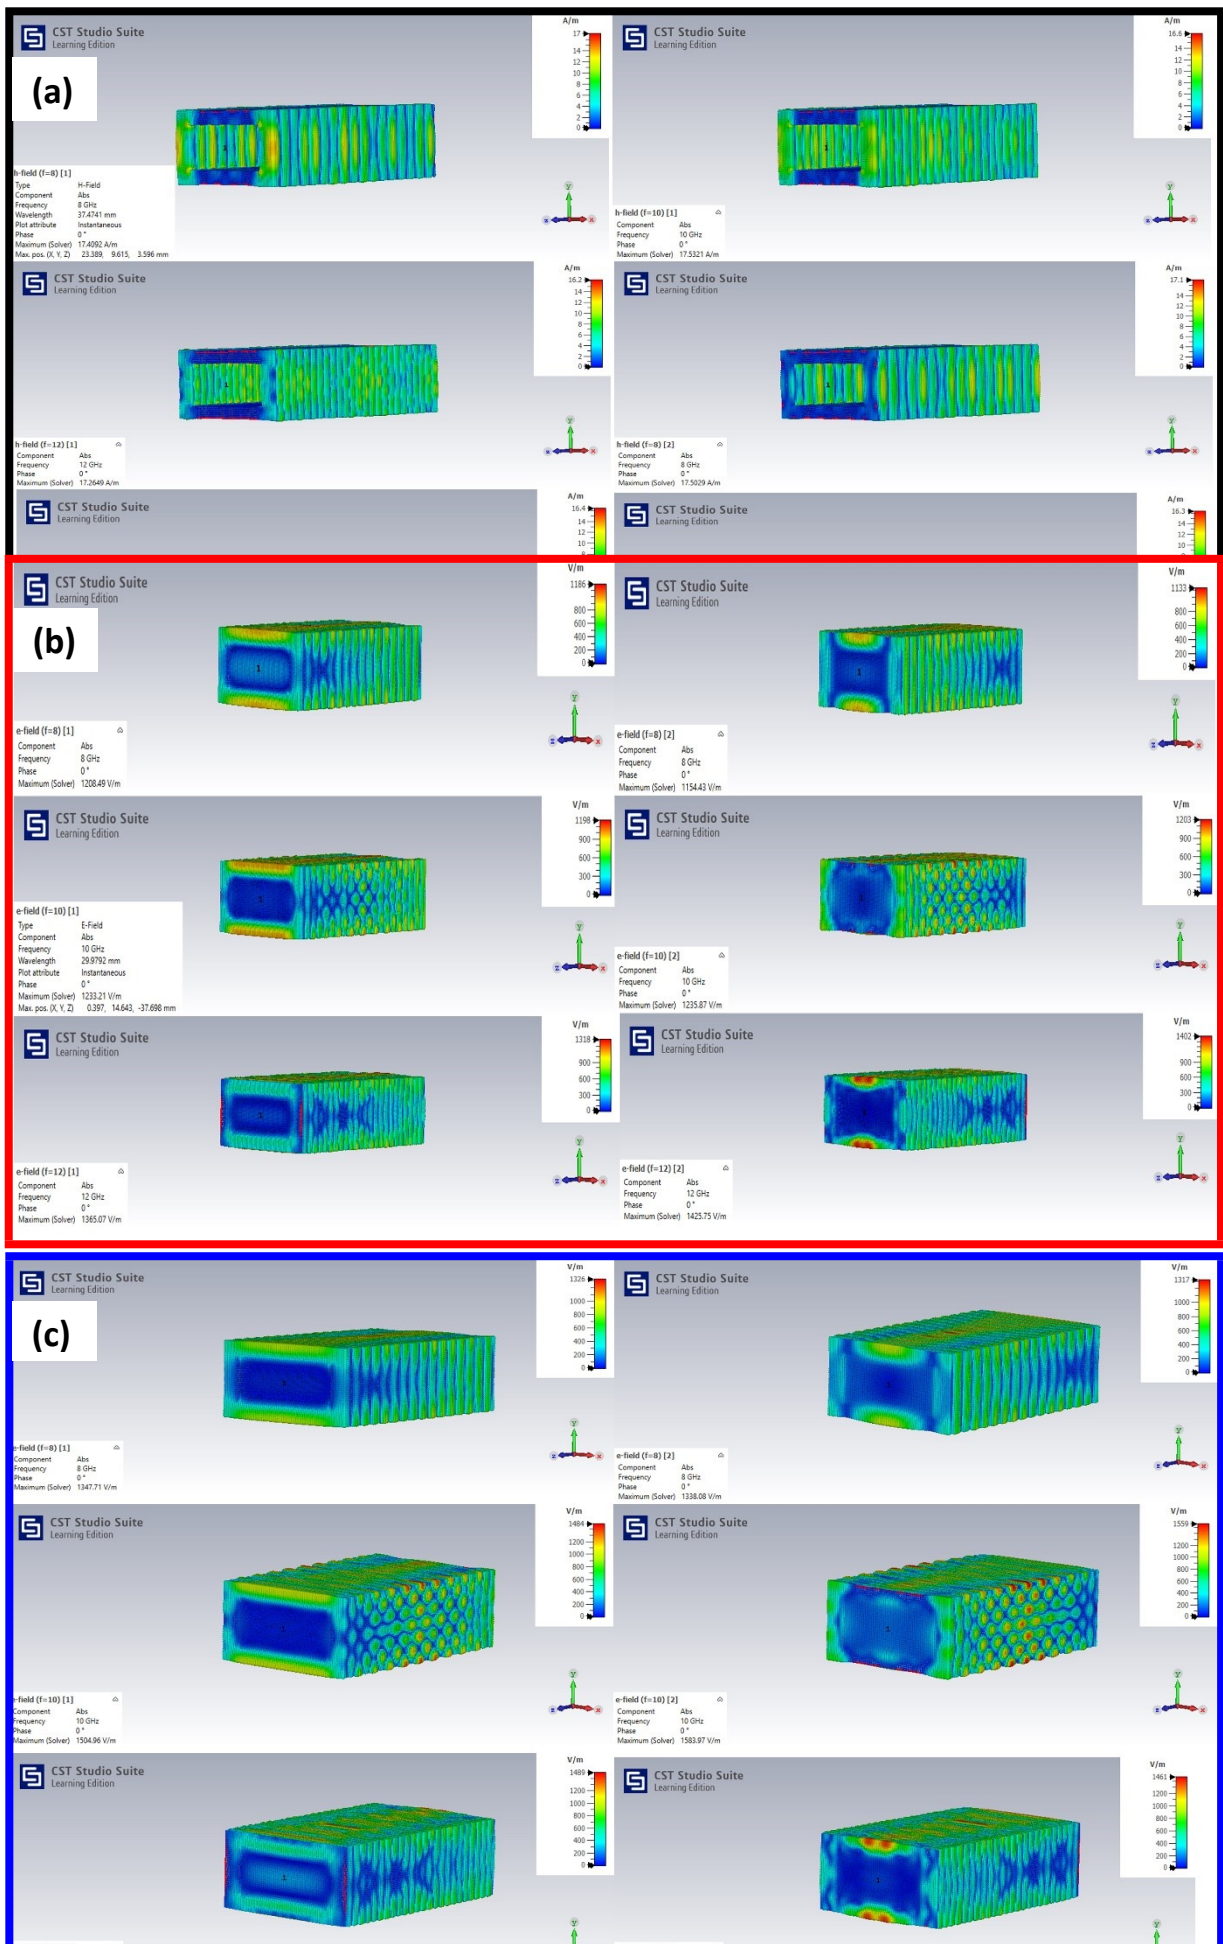

Fig.S5 (a-c) EM mode propagation at 8,10, 12 GHz range.
